# Supplementary material
Source: publisher figshare collection journal article supplement (https://acs.figshare.com/ndownloader/files/5339182)
Supplement: Supplementary file 1 [file 5339182]

data_publication_text
_ccdc_journal_manuscript_code    jo-2008-005733
_publ_requested_journal          J.Org.Chem.
_publ_contact_author_name        'Dr. Saumen Hajra'
_publ_contact_author_address     
;Department of Chemistry
Indian Institute of Technology
Kharagpur, , 721 302
India
;
_publ_contact_author_email       shajra@chem.iitkgp.ernet.in
_publ_contact_author_phone       (+91)-3222-283340
_publ_contact_author_fax         (+91)-3222-282252
loop_
_publ_author_name
_publ_author_address
'Dr. Saumen Hajra'
;Department of Chemistry
Indian Institute of Technology
Kharagpur, , 721 302
India
;

 
data_shag_972_0m
 
_audit_creation_method            SHELXL-97
_chemical_name_systematic
;
 ?
;
_chemical_name_common             ?
_chemical_melting_point           ?
_chemical_formula_moiety          ?
_chemical_formula_sum            'C11 H11 N O5'
_chemical_formula_weight          237.21
 
loop_
 _atom_type_symbol
 _atom_type_description
 _atom_type_scat_dispersion_real
 _atom_type_scat_dispersion_imag
 _atom_type_scat_source
 'C'  'C'   0.0033   0.0016
 'International Tables Vol C Tables 4.2.6.8 and 6.1.1.4'
 'H'  'H'   0.0000   0.0000
 'International Tables Vol C Tables 4.2.6.8 and 6.1.1.4'
 'N'  'N'   0.0061   0.0033
 'International Tables Vol C Tables 4.2.6.8 and 6.1.1.4'
 'O'  'O'   0.0106   0.0060
 'International Tables Vol C Tables 4.2.6.8 and 6.1.1.4'
 
_symmetry_cell_setting                  monoclinic
_symmetry_space_group_name_H-M          'P 21'
_symmetry_space_group_name_Hall         'P 2yb'
 
loop_
 _symmetry_equiv_pos_as_xyz
 'x, y, z'
 '-x, y+1/2, -z'
 
_cell_length_a                    6.0650(10)
_cell_length_b                    5.9654(9)
_cell_length_c                    14.695(2)
_cell_angle_alpha                 90.00
_cell_angle_beta                  91.142(5)
_cell_angle_gamma                 90.00
_cell_volume                      531.55(15)
_cell_formula_units_Z             2
_cell_measurement_temperature     293(2)
_cell_measurement_reflns_used     ?
_cell_measurement_theta_min       ?
_cell_measurement_theta_max       ?
 
_exptl_crystal_description        block
_exptl_crystal_colour             colourless
_exptl_crystal_size_max           0.20
_exptl_crystal_size_mid           0.20
_exptl_crystal_size_min           0.10
_exptl_crystal_density_meas       ?
_exptl_crystal_density_diffrn     1.482
_exptl_crystal_density_method     'not measured'
_exptl_crystal_F_000              248
_exptl_absorpt_coefficient_mu     0.119
_exptl_absorpt_correction_type    none
_exptl_absorpt_correction_T_min   ?
_exptl_absorpt_correction_T_max   ?
_exptl_absorpt_process_details    ?
 
_exptl_special_details
;
 ?
;
 
_diffrn_ambient_temperature       293(2)
_diffrn_radiation_wavelength      0.71073
_diffrn_radiation_type            MoK\a
_diffrn_radiation_source          'fine-focus sealed tube'
_diffrn_radiation_monochromator   graphite
_diffrn_measurement_device_type  'CCD area detector'
_diffrn_measurement_method       'phi and omega scans'
_diffrn_detector_area_resol_mean  ?
_diffrn_standards_number          ?
_diffrn_standards_interval_count  ?
_diffrn_standards_interval_time   ?
_diffrn_standards_decay_%         ?
_diffrn_reflns_number             7909
_diffrn_reflns_av_R_equivalents   0.0264
_diffrn_reflns_av_sigmaI/netI     0.0319
_diffrn_reflns_limit_h_min        -8
_diffrn_reflns_limit_h_max        8
_diffrn_reflns_limit_k_min        -8
_diffrn_reflns_limit_k_max        7
_diffrn_reflns_limit_l_min        -20
_diffrn_reflns_limit_l_max        20
_diffrn_reflns_theta_min          1.39
_diffrn_reflns_theta_max          30.37
_reflns_number_total              2797
_reflns_number_gt                 2150
_reflns_threshold_expression      >2sigma(I)
 
_computing_data_collection       'Bruker SMART'
_computing_cell_refinement       'Bruker SMART'
_computing_data_reduction        'Bruker SAINT'
_computing_structure_solution     'SHELXS-97 (Sheldrick, 1990)'
_computing_structure_refinement   'SHELXL-97 (Sheldrick, 1997)'
_computing_molecular_graphics     ?
_computing_publication_material   ?
 
_refine_special_details
;
 Refinement of F^2^ against ALL reflections.  The weighted R-factor wR and
 goodness of fit S are based on F^2^, conventional R-factors R are based
 on F, with F set to zero for negative F^2^. The threshold expression of
 F^2^ > 2sigma(F^2^) is used only for calculating R-factors(gt) etc. and is
 not relevant to the choice of reflections for refinement.  R-factors based
 on F^2^ are statistically about twice as large as those based on F, and R-
 factors based on ALL data will be even larger.
;
 
_refine_ls_structure_factor_coef  Fsqd
_refine_ls_matrix_type            full
_refine_ls_weighting_scheme       calc
_refine_ls_weighting_details
 'calc w=1/[\s^2^(Fo^2^)+(0.0535P)^2^+0.0766P] where P=(Fo^2^+2Fc^2^)/3'
_atom_sites_solution_primary      direct
_atom_sites_solution_secondary    difmap
_atom_sites_solution_hydrogens    geom
_refine_ls_hydrogen_treatment     constr
_refine_ls_extinction_method      none
_refine_ls_extinction_coef        ?
_refine_ls_abs_structure_details
 'Flack H D (1983), Acta Cryst. A39, 876-881'
_refine_ls_abs_structure_Flack    0.0(10)
_chemical_absolute_configuration     rm
_refine_ls_number_reflns          2797
_refine_ls_number_parameters      156
_refine_ls_number_restraints      1
_refine_ls_R_factor_all           0.0645
_refine_ls_R_factor_gt            0.0444
_refine_ls_wR_factor_ref          0.1125
_refine_ls_wR_factor_gt           0.1020
_refine_ls_goodness_of_fit_ref    1.032
_refine_ls_restrained_S_all       1.031
_refine_ls_shift/su_max           0.000
_refine_ls_shift/su_mean          0.000
 
loop_
 _atom_site_label
 _atom_site_type_symbol
 _atom_site_fract_x
 _atom_site_fract_y
 _atom_site_fract_z
 _atom_site_U_iso_or_equiv
 _atom_site_adp_type
 _atom_site_occupancy
 _atom_site_symmetry_multiplicity
 _atom_site_calc_flag
 _atom_site_refinement_flags
 _atom_site_disorder_assembly
 _atom_site_disorder_group
C1 C 0.7354(3) -0.2695(4) 0.84585(13) 0.0425(4) Uani 1 1 d . . .
C2 C 0.5670(3) -0.2390(3) 0.78172(13) 0.0399(4) Uani 1 1 d . . .
H2 H 0.5527 -0.3338 0.7317 0.048 Uiso 1 1 calc R . .
C3 C 0.4204(3) -0.0631(3) 0.79409(13) 0.0406(4) Uani 1 1 d . . .
C4 C 0.4474(4) 0.0723(4) 0.86971(14) 0.0537(6) Uani 1 1 d . . .
H4 H 0.3492 0.1897 0.8786 0.064 Uiso 1 1 calc R . .
C5 C 0.6169(5) 0.0375(5) 0.93259(15) 0.0634(7) Uani 1 1 d . . .
H5 H 0.6308 0.1303 0.9832 0.076 Uiso 1 1 calc R . .
C6 C 0.7645(4) -0.1334(4) 0.92031(14) 0.0536(6) Uani 1 1 d . . .
H6 H 0.8810 -0.1565 0.9614 0.064 Uiso 1 1 calc R . .
C7 C 0.2430(3) -0.0134(3) 0.72299(15) 0.0433(4) Uani 1 1 d . . .
H7 H 0.1027 0.0099 0.7535 0.052 Uiso 1 1 calc R . .
C8 C 0.2989(3) 0.1973(3) 0.66962(13) 0.0387(4) Uani 1 1 d . . .
H8 H 0.3070 0.3251 0.7115 0.046 Uiso 1 1 calc R . .
C9 C 0.5165(3) 0.1793(4) 0.61893(13) 0.0475(5) Uani 1 1 d . . .
H9A H 0.6066 0.3109 0.6306 0.057 Uiso 1 1 calc R . .
H9B H 0.5980 0.0481 0.6393 0.057 Uiso 1 1 calc R . .
C10 C 0.2529(3) 0.2098(3) 0.50651(14) 0.0412(4) Uani 1 1 d . . .
C11 C 0.1345(3) 0.2513(4) 0.59202(15) 0.0500(5) Uani 1 1 d . . .
H11A H 0.0056 0.1556 0.5954 0.060 Uiso 1 1 calc R . .
H11B H 0.0873 0.4064 0.5953 0.060 Uiso 1 1 calc R . .
N1 N 0.8881(3) -0.4570(4) 0.83229(12) 0.0526(5) Uani 1 1 d . . .
O1 O 0.8490(3) -0.5924(3) 0.77155(13) 0.0717(6) Uani 1 1 d . . .
O2 O 1.0498(4) -0.4700(4) 0.88289(14) 0.0868(7) Uani 1 1 d . . .
O3 O 0.2229(3) -0.2024(3) 0.66491(13) 0.0658(5) Uani 1 1 d . . .
H3 H 0.1046 -0.1969 0.6370 0.099 Uiso 1 1 calc R . .
O4 O 0.4642(2) 0.1617(2) 0.52354(9) 0.0464(4) Uani 1 1 d . . .
O5 O 0.1806(3) 0.2168(3) 0.42925(10) 0.0629(5) Uani 1 1 d . . .
 
loop_
 _atom_site_aniso_label
 _atom_site_aniso_U_11
 _atom_site_aniso_U_22
 _atom_site_aniso_U_33
 _atom_site_aniso_U_23
 _atom_site_aniso_U_13
 _atom_site_aniso_U_12
C1 0.0447(9) 0.0447(12) 0.0380(9) 0.0068(9) 0.0000(7) 0.0020(8)
C2 0.0458(10) 0.0346(10) 0.0391(9) 0.0018(8) -0.0024(7) 0.0001(8)
C3 0.0407(9) 0.0368(11) 0.0444(11) 0.0037(8) 0.0010(8) 0.0006(8)
C4 0.0633(14) 0.0528(14) 0.0451(11) -0.0047(10) 0.0038(10) 0.0140(11)
C5 0.0830(18) 0.0683(17) 0.0385(11) -0.0139(11) -0.0072(11) 0.0116(13)
C6 0.0600(13) 0.0627(15) 0.0377(10) 0.0033(10) -0.0095(9) 0.0036(11)
C7 0.0366(9) 0.0390(11) 0.0543(11) -0.0003(9) -0.0026(8) 0.0032(8)
C8 0.0400(9) 0.0334(10) 0.0426(10) -0.0034(8) -0.0027(7) 0.0067(8)
C9 0.0405(9) 0.0572(13) 0.0445(10) 0.0044(10) -0.0035(7) 0.0061(10)
C10 0.0459(9) 0.0279(9) 0.0495(10) 0.0039(8) -0.0075(8) -0.0055(8)
C11 0.0458(10) 0.0486(13) 0.0553(12) 0.0011(10) -0.0066(9) 0.0169(9)
N1 0.0539(11) 0.0574(12) 0.0463(9) 0.0090(9) -0.0046(8) 0.0146(9)
O1 0.0808(12) 0.0668(13) 0.0671(11) -0.0147(9) -0.0118(9) 0.0290(10)
O2 0.0785(12) 0.1051(17) 0.0757(12) -0.0083(13) -0.0311(10) 0.0406(12)
O3 0.0618(10) 0.0390(9) 0.0953(13) -0.0127(9) -0.0347(9) 0.0036(7)
O4 0.0467(7) 0.0502(9) 0.0424(7) 0.0031(6) 0.0017(5) -0.0001(7)
O5 0.0663(9) 0.0733(12) 0.0485(8) 0.0083(8) -0.0164(7) -0.0149(9)
 
_geom_special_details
;
 All esds (except the esd in the dihedral angle between two l.s. planes)
 are estimated using the full covariance matrix.  The cell esds are taken
 into account individually in the estimation of esds in distances, angles
 and torsion angles; correlations between esds in cell parameters are only
 used when they are defined by crystal symmetry.  An approximate (isotropic)
 treatment of cell esds is used for estimating esds involving l.s. planes.
;
 
loop_
 _geom_bond_atom_site_label_1
 _geom_bond_atom_site_label_2
 _geom_bond_distance
 _geom_bond_site_symmetry_2
 _geom_bond_publ_flag
C1 C6 1.371(3) . ?
C1 C2 1.388(3) . ?
C1 N1 1.468(3) . ?
C2 C3 1.390(3) . ?
C3 C4 1.381(3) . ?
C3 C7 1.514(3) . ?
C4 C5 1.384(3) . ?
C5 C6 1.371(4) . ?
C7 O3 1.418(3) . ?
C7 C8 1.523(3) . ?
C8 C9 1.532(3) . ?
C8 C11 1.534(3) . ?
C9 O4 1.435(2) . ?
C10 O5 1.210(2) . ?
C10 O4 1.332(2) . ?
C10 C11 1.481(3) . ?
N1 O2 1.221(3) . ?
N1 O1 1.223(3) . ?
 
loop_
 _geom_angle_atom_site_label_1
 _geom_angle_atom_site_label_2
 _geom_angle_atom_site_label_3
 _geom_angle
 _geom_angle_site_symmetry_1
 _geom_angle_site_symmetry_3
 _geom_angle_publ_flag
C6 C1 C2 123.03(19) . . ?
C6 C1 N1 119.22(18) . . ?
C2 C1 N1 117.75(17) . . ?
C1 C2 C3 118.33(18) . . ?
C4 C3 C2 118.75(19) . . ?
C4 C3 C7 120.80(18) . . ?
C2 C3 C7 120.36(18) . . ?
C3 C4 C5 121.6(2) . . ?
C6 C5 C4 120.1(2) . . ?
C1 C6 C5 118.2(2) . . ?
O3 C7 C3 108.13(16) . . ?
O3 C7 C8 111.32(17) . . ?
C3 C7 C8 110.76(16) . . ?
C7 C8 C9 113.27(16) . . ?
C7 C8 C11 114.06(17) . . ?
C9 C8 C11 101.94(16) . . ?
O4 C9 C8 107.70(15) . . ?
O5 C10 O4 120.88(19) . . ?
O5 C10 C11 128.16(19) . . ?
O4 C10 C11 110.96(17) . . ?
C10 C11 C8 106.05(16) . . ?
O2 N1 O1 123.0(2) . . ?
O2 N1 C1 117.8(2) . . ?
O1 N1 C1 119.22(17) . . ?
C10 O4 C9 111.18(15) . . ?
 
_diffrn_measured_fraction_theta_max    0.971
_diffrn_reflns_theta_full              30.37
_diffrn_measured_fraction_theta_full   0.971
_refine_diff_density_max    0.168
_refine_diff_density_min   -0.146
_refine_diff_density_rms    0.036
